# Supplementary material for: Photothermal self-healing of gold nanoparticle–polystyrene hybrids
Source: Royal Society of Chemistry journal article supplement (doi:10.1039/d0nr05621a), 2020-01-01
Supplement: d0nr05621a1.pdf [file d0nr05621a1.pdf]

## Supplementary information

### Photothermal self-healing of gold nanoparticle-polystyrene hybrids

Yi Je Cho<sup>a</sup>, Lingchen Kong<sup>a</sup>, Rezawana Islam<sup>a</sup>, Meitong Nie<sup>b</sup>, Wei Zhou<sup>b</sup>, and Kathy Lu<sup>\*a</sup>

<sup>a</sup>Department of Materials Science and Engineering, Virginia Polytechnic Institute and State University, Blacksburg, Virginia 24061, USA

<sup>b</sup>Department of Electrical and Computer Engineering, Virginia Polytechnic Institute and State University, Blacksburg, Virginia 24061

\*Corresponding author's email: [klu@vt.edu](mailto:klu@vt.edu)

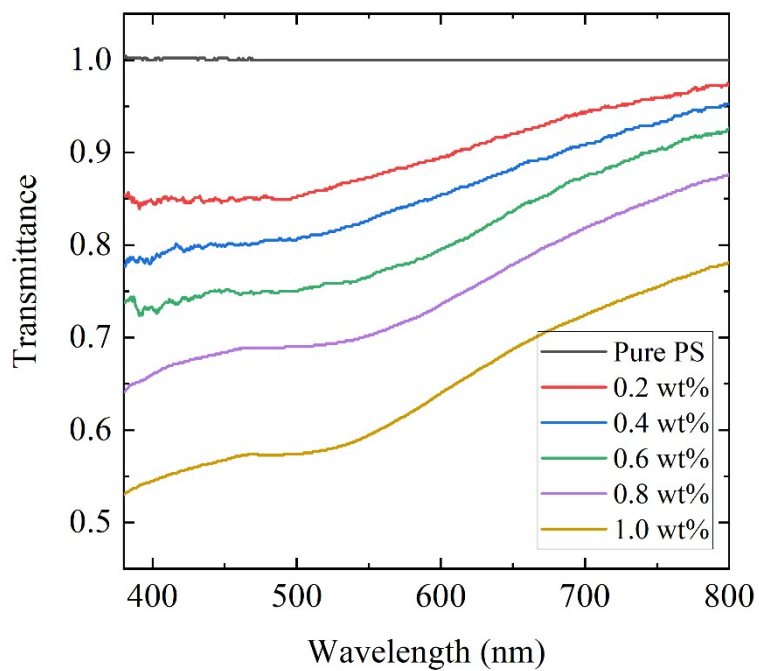

Fig. S1. Transmittance of the PS films with different Au contents in the visible light range obtained from UV-Vis tests.

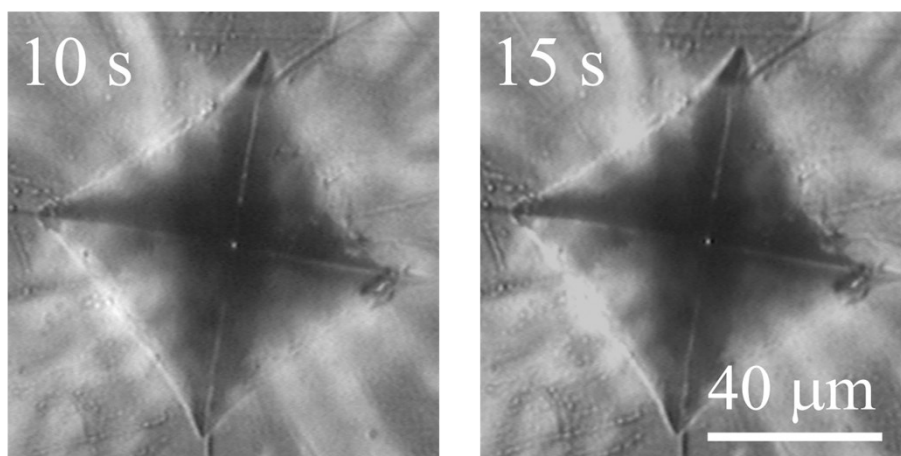

Fig. S2. Morphological evolution for an 80  $\mu\text{m}$ -sized indent in the pure PS film under irradiation of 532 nm laser, showing no healing of the indent.

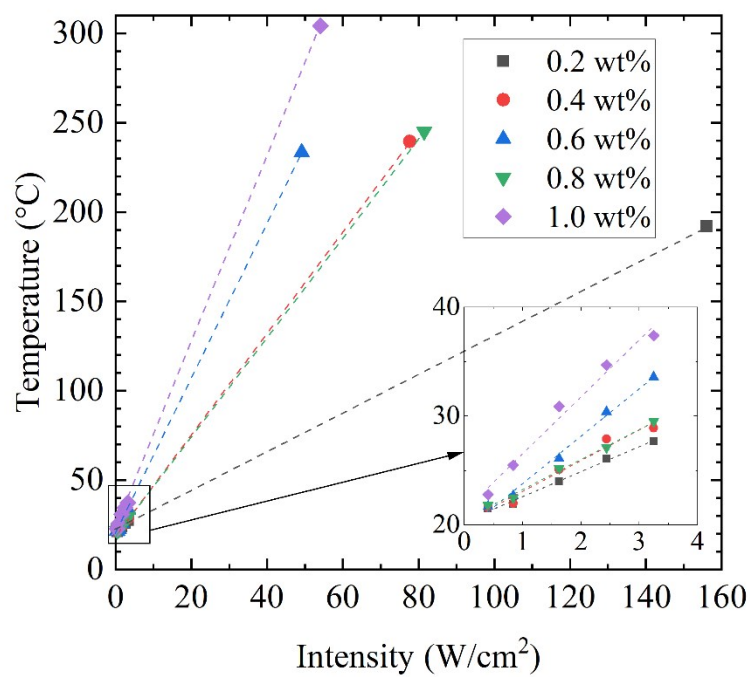

Fig. S3. Film temperatures under irradiation. The inset depicts the measured temperatures while the points outside of the inset are the extrapolated temperatures using linear fitting.
